# Supplementary material for: The Malay version of the attitudes and beliefs about cardiovascular disease (ABCD-M) risk questionnaire: a translation, reliability and validation study
Source: Springer Nature journal article supplement (doi:10.1186/s12889-022-13811-8), 2022-07-25
Supplement: MOESM2 [file 23301728]

**The ABCD Risk Questionnaire and Scoring guide**  
**Soal Selidik ABCD-M dan Panduan Pemarkahan**

| Scale                                                                                                                                                | Item                                                                                                                                                                                                                                                                                                                                                                                                                                                                                                                                                                                                                                                                                                                                                                                                                                                                                                                                                                                                                                                                                                                                                                                                                                                                                                                                                                                                                                                                                            | Answer                                                                                                                                                                             |
|------------------------------------------------------------------------------------------------------------------------------------------------------|-------------------------------------------------------------------------------------------------------------------------------------------------------------------------------------------------------------------------------------------------------------------------------------------------------------------------------------------------------------------------------------------------------------------------------------------------------------------------------------------------------------------------------------------------------------------------------------------------------------------------------------------------------------------------------------------------------------------------------------------------------------------------------------------------------------------------------------------------------------------------------------------------------------------------------------------------------------------------------------------------------------------------------------------------------------------------------------------------------------------------------------------------------------------------------------------------------------------------------------------------------------------------------------------------------------------------------------------------------------------------------------------------------------------------------------------------------------------------------------------------|------------------------------------------------------------------------------------------------------------------------------------------------------------------------------------|
| <p><b>1. Knowledge</b><br/> <b>Pengetahuan</b></p> <p>(8 items)</p> <p>Higher sum score = More knowledgeable/ more correct about having a stroke</p> | <p>1. One of the main causes of heart attack and stroke is stress.<br/> <i>Salah satu punca utama serangan jantung dan strok ialah stres.</i></p> <p>2. Walking and gardening are considered types of exercise that can lower the risk of having a heart attack or stroke.<br/> <i>Berjalan dan berkebun dianggap jenis senaman yang boleh mengurangkan risiko mendapat serangan jantung atau strok.</i></p> <p>3. Moderately intense activity of 2 ½ hours a week will reduce your chances of having a heart attack or stroke.<br/> <i>Aktiviti sederhana berat yang dilakukan selama 2 ½ jam seminggu akan mengurangkan kemungkinan anda untuk mendapat serangan jantung atau strok.</i></p> <p>4. People who have diabetes are at higher risk of having a heart attack or stroke.<br/> <i>Orang yang menghidap kencing manis mempunyai risiko yang lebih tinggi mendapat serangan jantung atau strok.</i></p> <p>5. Managing your stress levels will help you to manage your blood pressure.<br/> <i>Mengurus tahap stres anda akan dapat membantu anda menguruskan tekanan darah anda.</i></p> <p>6. Drinking high levels of alcohol can increase your cholesterol and triglyceride levels.<br/> <i>Minum alkohol yang tinggi kandungannya boleh meningkatkan tahap kolesterol dan trigliserida anda.</i></p> <p>7. HDL refers to 'good' cholesterol, and LDL refers to 'bad' cholesterol.<br/> <i>HDL merujuk kepada kolesterol 'baik', dan LDL merujuk kepada kolesterol 'buruk'.</i></p> | <p>Q1-T<br/> Q2-T<br/> Q3-T<br/> Q4-T<br/> Q5-T<br/> Q6-T<br/> Q7-T<br/> Q8-F</p> <p>T= True<br/> F= False</p> <p>Correct: Score = 1,<br/> Incorrect or Don't Know: Score = 0.</p> |

|                                                                                                                                                              |                                                                                                                                                                                                                                                                                                                                                                                                                                                                                                                                                                                                                                                                                                                                                                                                                                                                                                                                                                                                                                                                                                                                                                                                                                                                                                                                                                                                                                         |                                                                                                                                                                                                                                             |
|--------------------------------------------------------------------------------------------------------------------------------------------------------------|-----------------------------------------------------------------------------------------------------------------------------------------------------------------------------------------------------------------------------------------------------------------------------------------------------------------------------------------------------------------------------------------------------------------------------------------------------------------------------------------------------------------------------------------------------------------------------------------------------------------------------------------------------------------------------------------------------------------------------------------------------------------------------------------------------------------------------------------------------------------------------------------------------------------------------------------------------------------------------------------------------------------------------------------------------------------------------------------------------------------------------------------------------------------------------------------------------------------------------------------------------------------------------------------------------------------------------------------------------------------------------------------------------------------------------------------|---------------------------------------------------------------------------------------------------------------------------------------------------------------------------------------------------------------------------------------------|
|                                                                                                                                                              | <p>8. A family history of heart disease is not a risk factor for high blood pressure.<br/><i>Sejarah keluarga yang mempunyai penyakit jantung bukan faktor risiko untuk tekanan darah tinggi.</i></p>                                                                                                                                                                                                                                                                                                                                                                                                                                                                                                                                                                                                                                                                                                                                                                                                                                                                                                                                                                                                                                                                                                                                                                                                                                   |                                                                                                                                                                                                                                             |
| <p><b>2. Perceived CVD Risk</b><br/><b>Persepsi Risiko Strok</b></p> <p>(8 items)</p> <p>Higher sum score = higher perception of risk of having a stroke</p> | <p>9. I feel I will suffer from a heart attack or stroke sometime during my life.<br/><i>Saya rasa saya akan mengalami serangan jantung atau strok pada satu ketika semasa hidup saya.</i></p> <p>10. It is likely that I will suffer from a heart attack or stroke in the future.<br/><i>Ada kemungkinan saya akan mengalami serangan jantung atau strok pada masa hadapan.</i></p> <p>11. It is likely that I will have a heart attack or stroke some time during my life.<br/><i>Ada kemungkinan saya akan mengalami serangan jantung atau strok pada satu ketika semasa hidup saya.</i></p> <p>12. There is a good chance I will experience a heart attack or stroke in the next 10 years.<br/><i>Ada kemungkinan besar saya akan mengalami serangan jantung atau strok dalam 10 tahun akan datang.</i></p> <p>13. My chances of suffering from a heart attack or stroke in the next 10 years are great.<br/><i>Kemungkinan saya mengalami serangan jantung atau strok dalam 10 tahun akan datang adalah tinggi.</i></p> <p>14. It is likely I will have a heart attack or stroke because of my past and/or present behaviours.<br/><i>Ada kemungkinan saya akan mengalami serangan jantung atau strok kerana tingkah laku saya yang lalu dan/atau sekarang.</i></p> <p>15. I am not worried that I might have a heart attack or stroke.<br/><i>Saya tidak risau bahawa saya mungkin mengalami serangan jantung atau strok.</i></p> | <p><b>Q9 – 14 and 16;</b></p> <p>1=Strongly disagree;<br/>2=disagree; 3=agree;<br/>4=strongly agree;<br/>N/A = 0</p> <p><b>Q15 Reverse coded</b></p> <p>4=Strongly disagree;<br/>3=disagree; 2=agree;<br/>1=strongly agree;<br/>N/A = 0</p> |

|                                                                                                                                                                |                                                                                                                                                                                                                                                                                                                                                                                                                                                                                                                                                                                                                                                                                                                                                                                                                                                                                                                                                                                                                                                                                                                                     |                                                                                                                          |
|----------------------------------------------------------------------------------------------------------------------------------------------------------------|-------------------------------------------------------------------------------------------------------------------------------------------------------------------------------------------------------------------------------------------------------------------------------------------------------------------------------------------------------------------------------------------------------------------------------------------------------------------------------------------------------------------------------------------------------------------------------------------------------------------------------------------------------------------------------------------------------------------------------------------------------------------------------------------------------------------------------------------------------------------------------------------------------------------------------------------------------------------------------------------------------------------------------------------------------------------------------------------------------------------------------------|--------------------------------------------------------------------------------------------------------------------------|
|                                                                                                                                                                | <p>16. I am concerned about the likelihood of having a heart attack or stroke in the near future.<br/><i>Saya bimbang mengenai kemungkinan mendapat serangan jantung atau strok tidak lama lagi.</i></p>                                                                                                                                                                                                                                                                                                                                                                                                                                                                                                                                                                                                                                                                                                                                                                                                                                                                                                                            |                                                                                                                          |
| <p><b>3. Perceived Benefits</b><br/><i>Persepsi Kebaikan</i></p> <p>(4 items)</p> <p>Higher average score = Higher perceived benefits of diet and exercise</p> | <p>17. When I exercise for at least 2½ hours a week I am doing something good for the health of my heart.<br/><i>Apabila saya bersenam sekurang-kurangnya 2½ jam seminggu saya melakukan sesuatu yang baik untuk kesihatan jantung saya.</i></p> <p>18. I am confident that I can maintain a healthy weight by exercising at least 2½ hours a week within the next two months.<br/><i>Saya yakin saya dapat mengekalkan berat badan yang sihat dengan bersenam sekurang-kurangnya 2½ jam seminggu dalam tempoh dua bulan akan datang.</i></p> <p>19. When I eat at least five portions of fruit and vegetables a day I am doing something good for the health of my heart.<br/><i>Apabila saya makan sekurang-kurangnya lima hidangan buah-buahan dan sayur-sayuran sehari saya melakukan sesuatu yang baik untuk kesihatan jantung saya.</i></p> <p>20. Increasing my exercise to at least 2½ hours a week will decrease my chances of having a heart attack or stroke.<br/><i>Meningkatkan senaman saya untuk sekurang-kurangnya 2½ jam seminggu akan mengurangkan kemungkinan saya mendapat serangan jantung atau strok.</i></p> | <p><b>Q17 – 20;</b></p> <p>1=Strongly disagree;<br/>2=disagree; 3=agree;<br/>4=strongly agree;<br/>N/A = 0</p>           |
| <p><b>4. Intentions to Change</b><br/><i>Niat untuk Berubah</i></p> <p>(6 items)</p> <p>Higher average score = Higher perceived readiness for change with</p>  | <p>21. I am thinking about exercising at least 2½ hours a week.<br/><i>Saya memikirkan untuk bersenam sekurang-kurangnya 2½ jam seminggu.</i></p> <p>22. I intend or want to exercise at least 2½ hours a week.<br/><i>Saya berhasrat atau mahu bersenam sekurang-kurangnya 2½ jam seminggu.</i></p>                                                                                                                                                                                                                                                                                                                                                                                                                                                                                                                                                                                                                                                                                                                                                                                                                                | <p><b>Q21, 22, 24 and 25;</b></p> <p>1=Strongly disagree;<br/>2=disagree; 3=agree;<br/>4=strongly agree;<br/>N/A = 0</p> |

|                                                                  |                                                                                                                                                                                                                                                                                                                                                                                                                                                                                                                                                                                                                                                                                                                                                                                                                                                                        |                                                                                                                               |
|------------------------------------------------------------------|------------------------------------------------------------------------------------------------------------------------------------------------------------------------------------------------------------------------------------------------------------------------------------------------------------------------------------------------------------------------------------------------------------------------------------------------------------------------------------------------------------------------------------------------------------------------------------------------------------------------------------------------------------------------------------------------------------------------------------------------------------------------------------------------------------------------------------------------------------------------|-------------------------------------------------------------------------------------------------------------------------------|
| <p>regard to exercise behaviour and health dietary behaviour</p> | <p>23. I am not thinking about exercising for 2 ½ hours a week.<br/><i>Saya tidak memikirkan untuk bersenam selama 2 ½ jam seminggu.</i></p> <p>24. I am confident that I can eat at least five portions of fruit and vegetables per day within the next two months.<br/><i>Saya yakin saya boleh makan sekurang-kurangnya lima hidangan buah-buahan dan sayur-sayuran setiap hari dalam tempoh dua bulan akan datang.</i></p> <p>25. I am thinking about eating at least five portions of fruit and vegetables a day.<br/><i>Saya memikirkan untuk makan sekurang-kurangnya lima hidangan buah-buahan dan sayur-sayuran setiap hari.</i></p> <p>26. I am not thinking about eating at least five portions of fruit and vegetables a day.<br/><i>Saya tidak memikirkan untuk makan sekurang-kurangnya lima hidangan buah-buahan dan sayur-sayuran setiap hari.</i></p> | <p><b>Q23 and 26 Reverse coded</b></p> <p>4=Strongly disagree;<br/>3=disagree; 2=agree;<br/>1=strongly agree;<br/>N/A = 0</p> |
|------------------------------------------------------------------|------------------------------------------------------------------------------------------------------------------------------------------------------------------------------------------------------------------------------------------------------------------------------------------------------------------------------------------------------------------------------------------------------------------------------------------------------------------------------------------------------------------------------------------------------------------------------------------------------------------------------------------------------------------------------------------------------------------------------------------------------------------------------------------------------------------------------------------------------------------------|-------------------------------------------------------------------------------------------------------------------------------|
